# A Novel Retro-Inverso Peptide Inhibitor Reduces Amyloid Deposition, Oxidation and Inflammation and Stimulates Neurogenesis in the APP<sup>swe</sup>/PS1 $\Delta$ E9 Mouse Model of Alzheimer's Disease

Vadivel Parthasarathy<sup>1</sup>, Paula L. McClean<sup>1</sup>, Christian Hölscher<sup>1</sup>, Mark Taylor<sup>2</sup>, Claire Tinker<sup>2</sup>, Glynn Jones<sup>2</sup>, Oleg Kolosov<sup>3</sup>, Elisa Salvati<sup>4</sup>, Maria Gregori<sup>4</sup>, Massimo Masserini<sup>4</sup>, David Allsop<sup>2\*</sup>

**1** School of Biomedical Sciences, University of Ulster, Coleraine, Co. Londonderry, United Kingdom, **2** Division of Biomedical and Life Sciences, University of Lancaster, Lancaster, Lancashire, United Kingdom, **3** Department of Physics, University of Lancaster, Lancaster, Lancashire, United Kingdom, **4** Department of Experimental Medicine, University of Milano-Bicocca, Monza, Milan, Italy

## Abstract

Previously, we have developed a retro-inverso peptide inhibitor (RI-OR2, rGffvlkGr) that blocks the *in vitro* formation and toxicity of the A $\beta$  oligomers which are thought to be a cause of neurodegeneration and memory loss in Alzheimer's disease. We have now attached a retro-inverted version of the HIV protein transduction domain 'TAT' to RI-OR2 to target this new inhibitor (RI-OR2-TAT, Ac-rGffvlkGrrrrrqrkkGy-NH<sub>2</sub>) into the brain. Following its peripheral injection, a fluorescein-labelled version of RI-OR2-TAT was found to cross the blood brain barrier and bind to the amyloid plaques and activated microglial cells present in the cerebral cortex of 17-months-old APP<sup>swe</sup>/PS1 $\Delta$ E9 transgenic mice. Daily intraperitoneal injection of RI-OR2-TAT (at 100 nmol/kg) for 21 days into 10-months-old APP<sup>swe</sup>/PS1 $\Delta$ E9 mice resulted in a 25% reduction ( $p < 0.01$ ) in the cerebral cortex of A $\beta$  oligomer levels, a 32% reduction ( $p < 0.0001$ ) of  $\beta$ -amyloid plaque count, a 44% reduction ( $p < 0.0001$ ) in the numbers of activated microglial cells, and a 25% reduction ( $p < 0.0001$ ) in oxidative damage, while the number of young neurons in the dentate gyrus was increased by 210% ( $p < 0.0001$ ), all compared to control APP<sup>swe</sup>/PS1 $\Delta$ E9 mice injected with vehicle (saline) alone. Our data suggest that oxidative damage, inflammation, and inhibition of neurogenesis are all a downstream consequence of A $\beta$  aggregation, and identify a novel brain-penetrant retro-inverso peptide inhibitor of A $\beta$  oligomer formation for further testing in humans as a potential disease-modifying treatment for Alzheimer's disease.

**Citation:** Parthasarathy V, McClean PL, Hölscher C, Taylor M, Tinker C, et al. (2013) A Novel Retro-Inverso Peptide Inhibitor Reduces Amyloid Deposition, Oxidation and Inflammation and Stimulates Neurogenesis in the APP<sup>swe</sup>/PS1 $\Delta$ E9 Mouse Model of Alzheimer's Disease. PLoS ONE 8(1): e54769. doi:10.1371/journal.pone.0054769

**Editor:** Damian Christopher Crowther, Cambridge Institute for Medical Research, United Kingdom

**Received:** October 29, 2012; **Accepted:** December 14, 2012; **Published:** January 31, 2013

**Copyright:** © 2013 Parthasarathy et al. This is an open-access article distributed under the terms of the Creative Commons Attribution License, which permits unrestricted use, distribution, and reproduction in any medium, provided the original author and source are credited.

**Funding:** Part of this work was funded by a grant from Alzheimer's Research UK. The funder had no role in study design, data collection and analysis, decision to publish, or preparation of the manuscript. No additional external funding was received for this study.

**Competing Interests:** The authors have declared that no competing interests exist.

\* E-mail: d.allsop@lancaster.ac.uk

## Introduction

Alzheimer's disease (AD) is the leading cause of dementia in the elderly and afflicts around 12% of people over the age of 65, rising to 46% of those over the age of 80 [1]. In 2010 there were 36 million cases of AD worldwide, and this number is expected to approximately double every 20 years, to 66 million in 2030, and 115 million in 2050 [2]. Despite substantial progress in understanding the pathobiology of AD, this knowledge has not been translated yet into any effective treatment. Currently available drugs for AD can only temporarily alleviate the symptoms of the disease, and they do not have a major impact on disease progression. It is, therefore, imperative that new and more effective treatments are developed.

There is substantial and well known evidence from molecular genetics, transgenic animal studies and aggregation/toxicity studies to suggest that the conversion of the  $\beta$ -amyloid (A $\beta$ ) peptide from monomers into aggregated forms in the brain is a key (and possibly seminal) event in the pathogenesis of AD [3], [4].

The other major characteristic pathological change in AD is the formation of neurofibrillary tangles (NFTs) inside nerve cells, which are derived from a hyperphosphorylated form of tau protein. NFTs are likely to represent a secondary feature, following on from the deposition of A $\beta$  [5]. Aggregated forms of A $\beta$  are toxic to nerve cells, and have potent effects on memory and learning. There is increasing emphasis on 'soluble oligomers' as the pathological form of A $\beta$ , rather than amyloid fibres, and these small oligomers could be one of the major causes of neurodegeneration and memory loss in AD [6–12]. Inhibition of toxic A $\beta$  oligomer formation is therefore a potential therapeutic target for AD and inhibitors of early-stage A $\beta$  aggregation could slow or even halt the progression of this disease [6–15]. However, the downstream consequences of inhibition of A $\beta$  oligomer formation *in vivo* have not been clearly established. Although considerable progress has been made in discovering a wide range of inhibitors of A $\beta$  aggregation, many of these past studies have utilized techniques such as turbidity, thioflavin-T binding, sedimentation and Congo red binding, which can only identify compounds that

are capable of inhibiting the formation of fibrils, and so the effects of these inhibitors on oligomer formation are often not clear. Furthermore, most of these inhibitors are not suitable for clinical development, and so very few of them have succeeded in animal studies or have progressed to human clinical trials [15].

Some of us have reported previously the development of a retro-inverso peptide inhibitor (RI-OR2, Ac-rGffvlkGr-NH<sub>2</sub>) that blocks the formation of A $\beta$  oligomers and fibrils *in vitro* and also inhibits the toxic effects of A $\beta$  on cultured cells [16]. This inhibitor consists of a retro-inverted version of the internal A $\beta$ (16–20) sequence, KLVFF, flanked by the solubilizing residues rG- and -Gr. In the retro-inverso peptide, the L-amino acids are replaced by D-amino acids (represented by lower case letters) and the sequence is reversed. KLVFF was chosen because it is the region that is primarily responsible for the self-association and aggregation of A $\beta$  [17], [18]. Other groups have also developed peptide-based inhibitors of A $\beta$  aggregation [19–26]. For example, Soto and co-workers have designed ‘ $\beta$ -sheet breaker peptides’ by incorporating proline residues into a similar part of the A $\beta$  peptide sequence [20,21] and another strategy has used N-methylated peptides [22], [23]. Although there has been considerable research into these types of peptide inhibitors, none of them have entered into advanced human clinical trials. Our own inhibitor, RI-OR2, was shown to be highly resistant to proteolysis, and so should be stable *in vivo* [16]. However, in surface plasmon resonance (SPR) experiments, it was found to bind to immobilized A $\beta$ (1–42) (A $\beta$ 42) monomers, oligomers and fibrils with only modest affinity ( $k_d=9\text{--}29\ \mu\text{M}$ ) [16]. Moreover, RI-OR2 is not designed to penetrate the blood-brain barrier (BBB) and so is unlikely to be a suitable drug candidate for AD.

For this report, we have attached a retro-inverted version of the HIV protein transduction domain ‘TAT’ [27] to RI-OR2, to produce a cell-permeable and brain-penetrant inhibitor of A $\beta$  oligomer and fibril formation (Ac-rGffvlkGrrrrqrkrkGr-NH<sub>2</sub>) which we refer to as RI-OR2-TAT. We show that peripheral administration of this inhibitor into the APP<sup>swe</sup>/PS1 $\Delta$ E9 (APP/PS1) transgenic mouse model of AD reduced A $\beta$  oligomer formation, amyloid deposition and the associated oxidation and inflammatory reactions in the brain, and also had a marked effect on stimulation of neurogenesis.

## Methods

### Ethics Statement

All animal experiments were licensed by the UK Home Office in accordance with the UK animals (Scientific Procedures) Act 1986.

### Peptides

All of the inhibitors used for this study were custom made by Cambridge Peptides (Birmingham, UK) and were >95% purity. Recombinant A $\beta$ 42, Ultrapure, was purchased from rPeptide, Bogart, Georgia, USA. Prior to use for *in vitro* aggregation experiments, A $\beta$ 42 was deseeded [16]. The peptide was dissolved at 1 mg/ml in trifluoroacetic acid containing 4.5% thioanisole. After 1 h incubation at room temperature, all liquid was evaporated using a stream of oxygen-free nitrogen gas. The peptide was dissolved in 1,1,1,3,3,3-hexafluoro-2-propanol (HFIP) and this was then removed by centrifugation under vacuum. The latter process was repeated twice more before splitting the solution into smaller aliquots which were dried and stored at  $-20^\circ\text{C}$  until use.

### Thioflavin T (ThT) Assay for A $\beta$ Fibrils

This method was the same as that published previously [16]. Briefly, 60  $\mu\text{l}$  samples of solutions containing A $\beta$ 42 (25  $\mu\text{M}$ ), ThT (15  $\mu\text{M}$ ) and between 0 and 125  $\mu\text{M}$  RI-OR2 or RI-OR2-TAT, in 10 mM phosphate buffered saline (PBS), pH 7.4, were incubated in sealed, black, clear-bottomed 384-well plates (Corning). ThT fluorescence was monitored every 10 mins ( $\lambda_{\text{exc}}=442\ \text{nm}$ ,  $\lambda_{\text{em}}=483\ \text{nm}$ ) for 48 h at  $30^\circ\text{C}$  in a Biotek Synergy 2 plate reader.

### Immunoassay for A $\beta$ Oligomers (*in vitro*)

This is a more sensitive test than the ThT assay for the detection of early oligomeric forms of A $\beta$  [16]. Microtitre plates (96-well, Maxisorb) were coated with 6E10, diluted 1:1000 in 10 mM PBS, pH 7.4, for overnight at  $4^\circ\text{C}$ . The plates were blocked with assay buffer (Tris-buffered saline (TBS) (pH 7.4), containing 0.05%  $\gamma$ -globulins and 0.005% Tween 20) plus 5% gelatine for 1 h at  $37^\circ\text{C}$ . Samples of peptide (12.5  $\mu\text{M}$  A $\beta$ 42 and 0, 3.125, 6.25, 12.5, 25 or 62.5  $\mu\text{M}$  RI-OR2-TAT in 10 mM PBS, pH 7.4) were incubated at  $25^\circ\text{C}$  for 0, 4, 8, 24 or 48 h, diluted to 1  $\mu\text{M}$  A $\beta$ , and plated in triplicate. The plates were incubated for 1 h at  $37^\circ\text{C}$  and then washed with PBS plus 0.05% Tween-20 (PBST). A 1:1,000 dilution of biotinylated 6E10 was then added to each well, left for 1 h at  $37^\circ\text{C}$ , and the plates were washed with PBST. Europium-linked streptavidin was then added to the wells at 1:500 dilution in StrepE buffer (TBS containing 20  $\mu\text{M}$  DTPA, 0.5% bovine serum albumin, and 0.05%  $\gamma$ -globulins), incubated for 1 h, and washed as before. Enhancer solution was added and the plates were read on a Wallac Victor 2 plate reader, using the time-resolved fluorescence setting for europium.

### Cell Penetration and Cytotoxicity Experiments

For cell penetration experiments, the fluorescein-tagged peptides were added to cell growth medium on a slide containing cultured SHSY-5Y cells at a concentration of 0.1  $\mu\text{M}$  and micrographs were taken after 10 mins (Flu-RI-OR2-TAT) or 1 h (Flu-RI-OR2) incubations.

For cell toxicity assays, SHSY-5Y neuroblastoma cells were maintained in 10% Fetal Calf Serum supplemented Dulbecco’s Modified Eagle Medium (DMEM, Gibco) under standard mammalian cell culture conditions. The cells were transferred to sterile 96-well growth plates at 20,000 cells/well and 4 wells per condition. To test for any toxic effects of RI-OR2-TAT alone on the cells, they were left to adhere for 24 h before the addition of the inhibitor (at 12.5, 25, 50, 100 and 200  $\mu\text{M}$ ), in DMEM. To assess the ability of RI-OR2-TAT to protect against A $\beta$  toxicity, the cell growth medium was changed to OptiMem (Invitrogen) and A $\beta$ 42, pre-aggregated (at 100  $\mu\text{M}$ ) for 24 h at  $25^\circ\text{C}$  in PBS, was added to the cells at a concentration of 5  $\mu\text{M}$ , together with various amounts (0, 0.1, 0.5, 1, 5 or 10  $\mu\text{M}$ ) of RI-OR2-TAT. In each case, after a further 24 h incubation period, the viability of the cells was assessed using a CytoTox 96<sup>®</sup> Non-Radioactive Cytotoxicity Assay (LDH) Assay (Promega) kit.

### Surface Plasmon Resonance (SPR)

These experiments were conducted using a Sensi Q semi-automatic SPR machine (ICx Nomadics). This apparatus has two parallel flow cells; one was used to immobilize A $\beta$ 42 fibrils while the other was used as ‘reference’ (empty surface). A COOH5 sensor chip (ICx Nomadics) was employed for this purpose and the peptide was immobilized by amine coupling chemistry. Briefly, after surface activation, the peptide preparation was diluted to 10  $\mu\text{M}$  in acetate buffer (pH 4.0) and then injected for 5 min at

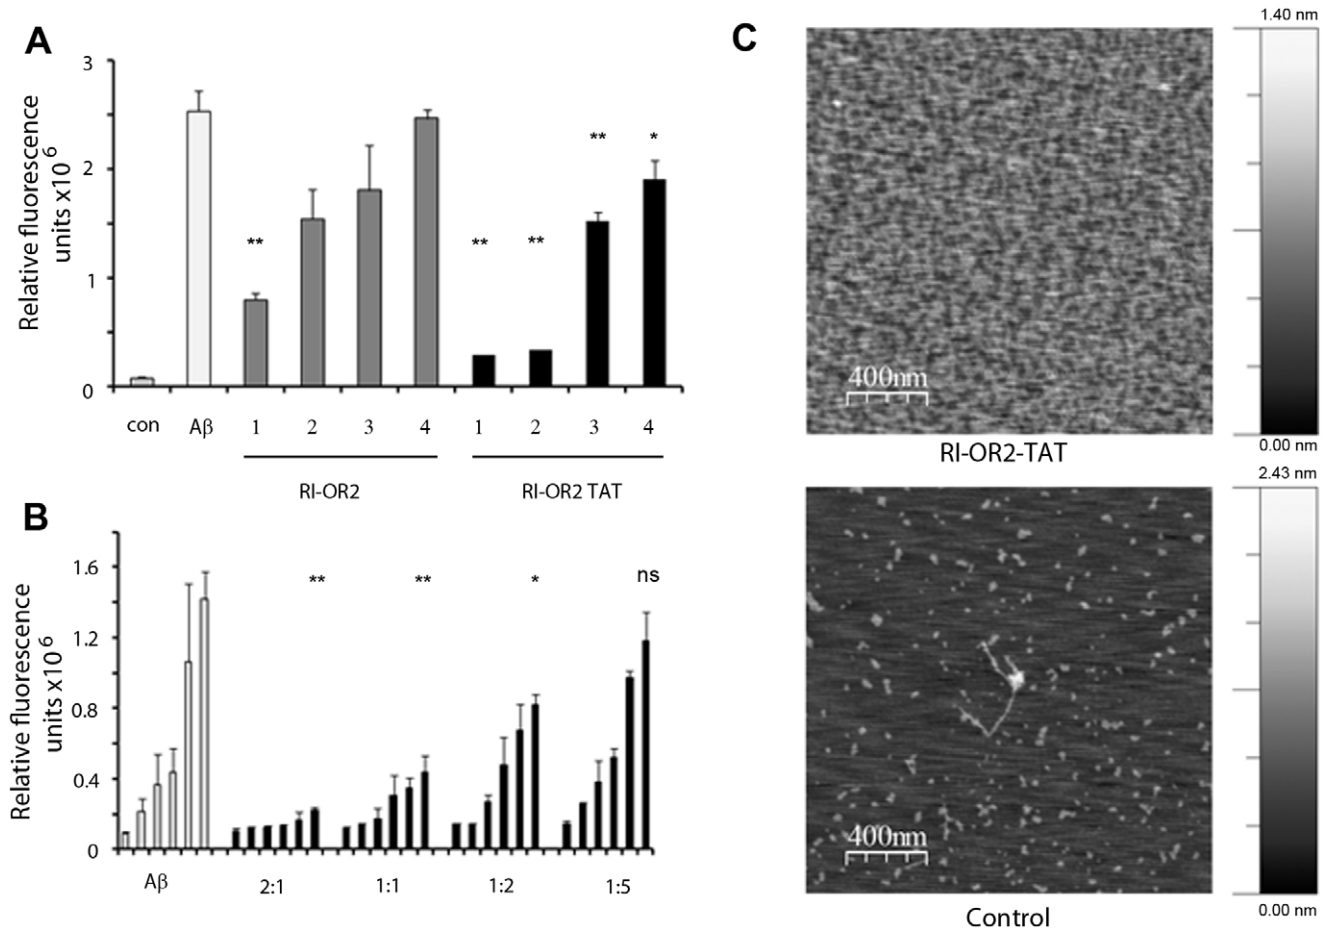

**Figure 1. RI-OR2 and RI-OR2-TAT inhibit the aggregation of Aβ42.** (A) ThT data for Aβ42 incubated with and without these inhibitors: 'con' is buffer only; 'Aβ' is Aβ42 incubated at 25 μM for 48 h, with no inhibitor; the dark grey bars are Aβ42 incubated for 48 h with RI-OR2 at 1–25:25, 2–12.5:25, 3–6.75:25, 4–2.5:25 μM concentration of inhibitor:Aβ; and the black bars are Aβ42 incubated with RI-OR2-TAT at these same molar ratios. (B) Effects of the inhibitors on detection of multimeric Aβ42 by immunoassay. The data for Aβ42 alone, incubated at 12.5 μM, are shown on the left (pale bars), and for Aβ42 incubated with 25:12.5, 12.5:12.5, 6.75:12.5 and 2.5:12.5 μmolar concentrations of RI-OR2-TAT:Aβ on the right (black bars). In each case, the consecutive bars are for 0, 4, 8, 24 and 48 h incubations. Statistics: for both (A) and (B), \*denotes  $p < 0.05$  for treated sample versus untreated control, and \*\*denotes  $p < 0.01$ . (C) AFM images of a 24 h incubation of Aβ42 (25 μM) in the presence and absence (Control) of RI-OR2-TAT (12.5 μM). Scale bar is to the right. doi:10.1371/journal.pone.0054769.g001

a flow rate of 30 μl/min. Any remaining activated groups were blocked with ethanolamine (pH 8.0). The final immobilization level was ~5,000 resonance units (1 RU = 1 pg of protein/mm<sup>2</sup>). The empty "reference" surface was prepared in parallel using the same immobilization procedure, but without addition of the peptide. Sensorgrams were then obtained *via* injection of three different concentrations of RI-OR2-TAT (1, 3 and 6 μM), as well as the vehicle (PBS with 0.005% Tween 20), over the immobilized ligand or control surface, in parallel.

These SPR data can be interpreted to provide an estimate for the affinity of binding of the inhibitors to Aβ fibrils [16], [28]. Data for the three concentrations of RI-OR2-TAT were fitted separately by Qdat software [ICx Nomadics] using the 1:1 pseudo-first order Langmuir interaction model. Eq. 1 was used to fit the association while the dissociation was fitted by eq. 2. The rate constants ( $k_{on}$  and  $k_{off}$ ) were used to calculate  $k_d$  as reported in eq. 3.

$$R_t(\text{rise}) = \frac{C \cdot k_{on} \cdot R_{max} [1 - \exp(- (C \cdot k_{on} + k_{off}) t)]}{(C \cdot k_{on} + k_{off})} \quad (1)$$

$$R_t(\text{fall}) = R_0 \cdot \exp(-k_{off} \cdot t) \quad (2)$$

$$k_d = k_{off} / k_{on} \quad (3)$$

Where  $R_t$  is binding response at time  $t$ ;  $C$  is the molar concentration of the analyte at the interaction surface at time  $t$ ;  $R_{max}$  is the maximal binding response;  $R_0$  is the binding response at time  $t_0$  (i. e. time at the onset of the dissociation phase);  $k_{on}$  is the association rate constant;  $k_{off}$  is the dissociation rate constant. Values were expressed as a mean ± SD.

#### Atomic Force Microscopy (AFM)

Aβ42 was incubated at 25 μM in the presence or absence of 12.5 μM RI-OR2-TAT in PBS, pH 7.4, for 24 h. Samples were diluted 1:10 in PBS and then a 2 μl aliquot was deposited onto the surface of freshly cleaned mica and allowed to dry.

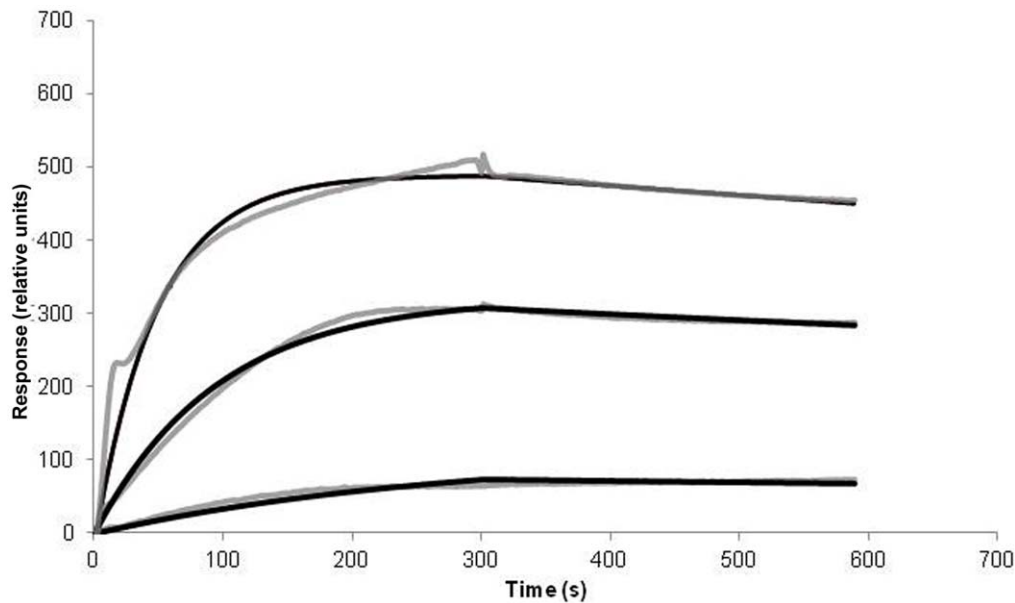

**Figure 2. Binding of RI-OR2-TAT to immobilized A $\beta$ 42 fibrils, as shown by surface plasmon resonance (SPR) spectroscopy.** The peptide was injected in solution at three different concentrations, for 5 mins at a flow rate of 30  $\mu$ l/min. The upper line shows data for 6  $\mu$ M RI-OR2-TAT, the middle line for 3  $\mu$ M RI-OR2-TAT and the lower line for 1  $\mu$ M RI-OR2-TAT. The non-specific binding obtained from the reference surface has been automatically subtracted from all data. Fitted curves are shown in black.  
doi:10.1371/journal.pone.0054769.g002

Images were obtained in tapping mode using a Multimode<sup>TM</sup> SPM NanoScope IIIa microscope (Digital Instruments, New York, USA). Silicon cantilever tips measuring 125  $\mu$ m long, 30  $\mu$ m wide and with a tip radius <10 nm were used (Budget Sensors, Bulgaria). The resonance frequency was 300 kHz and force constants 40 N/m. All images were first order flattened and edited using WSxM 5.0 Develop 4.3 software, (Nanotech, Madrid, Spain) [29].

## Animals

APP<sup>swe</sup>/PS1 $\Delta$ E9 mice with a C57Bl/6 background (APP/PS1 mice) were obtained from the Jackson lab (<http://research.jax.org/repository/alzheimers.html>). To determine if Flu-RI-OR2-TAT crosses the blood brain barrier (experiment 1), 2 male 17-months-old APP/PS1 animals and 2 16-months-old C57Bl/6 animals were used. To look at the effects of RI-OR2-TAT on mouse brain pathology (experiment 2), 8 female 10-months-old APP/PS1 mice were used. The animals were housed in single cages in a temperature controlled holding room (21.5°C $\pm$ 1) with 12:12 h light and dark cycle. Food and water was available *ad libitum*.

## Drug Treatment

For experiment 1, all 4 animals were injected i.p. with 100 nmol/kg of Flu-RI-OR2-TAT in 0.9% NaCl at 0 h. The animals were then housed in a dark room. After 1 h, the animals were anaesthetised with isoflurane and sodium barbiturate (Dolethal, Bayer, Germany), transcardially perfused and the brains were retrieved and fixed in 4% ice cold paraformaldehyde.

For experiment 2, 4 animals were injected intraperitoneally (i.p.) with 0.9% NaCl (vehicle control) and the other 4 with RI-OR2-TAT (100 nmol/kg in 0.9% NaCl) once daily, for 21 days. On the 22<sup>nd</sup> day, the animals were perfused transcardially with ice-cold PBS and 4% paraformaldehyde and then the brains were removed and post-fixed in 4% ice cold paraformaldehyde.

## Immunostaining

All brains in paraformaldehyde were transferred to 30% sucrose overnight and then snap frozen with Envirofreez<sup>TM</sup> (Sigma, UK) and, using a Leica cryostat, 40 microns thick coronal sections were cut at anatomical regions of -2 to -3 bregma. Sections were preserved in cryoprotect with the first section taken at random and then every 5<sup>th</sup> section afterwards.

For experiment 1 (BBB penetration), individual sections were incubated with the following primary antibodies at 4°C overnight: anti-A $\beta$  (1:200 dilution, Invitrogen, 71-5800), or anti-Iba 1 (1:1000 dilution, Wako 016-20001, Germany). Sections were then stained with goat anti-rabbit Alexa Fluor 555 (1:150 dilution, A21428 Invitrogen) for 1 h.

For experiment 2 (effects on brain pathology), sections were examined for activated microglia (using anti-Iba-1 antibody), oxidative stress (anti-8-oxo-guanine antibody), immature neurons (anti-doublecortin antibody) or total plaque load (anti-A $\beta$  antibody). Activated microglia were visualised following incubation of brain sections in 0.05 M sodium citrate buffer, pH 9 at 90°C for 30 minutes before they were stained using an anti Iba-1 antibody (1:2000 dilution, Wako 016-20001, Germany) [30]. Oxidative stress was assessed by denaturing DNA in each section using 2N HCl and the sections were then stained for 8-oxo guanine (1:200 dilution, MAB3560, Millipore). Young immature neurons were detected by immunostaining for doublecortin (1:200 dilution, sc-66911, Santa Cruz Biotechnology). Total plaque load was quantified by immunostaining for  $\beta$ -amyloid (1:200 dilution, Invitrogen, 71-5800).

All sections were visualized using an Axio Scope 1 fluorescence microscope (Zeiss, Germany). For quantification, two images per section were taken from the cortex area with a 10X objective for 8-oxo guanine and  $\beta$ -amyloid staining, and a 100X objective for Iba1 staining, with a minimum of 5 sections visualized per animal. Image analysis was performed using multi threshold plug in Image J (NIH, USA).

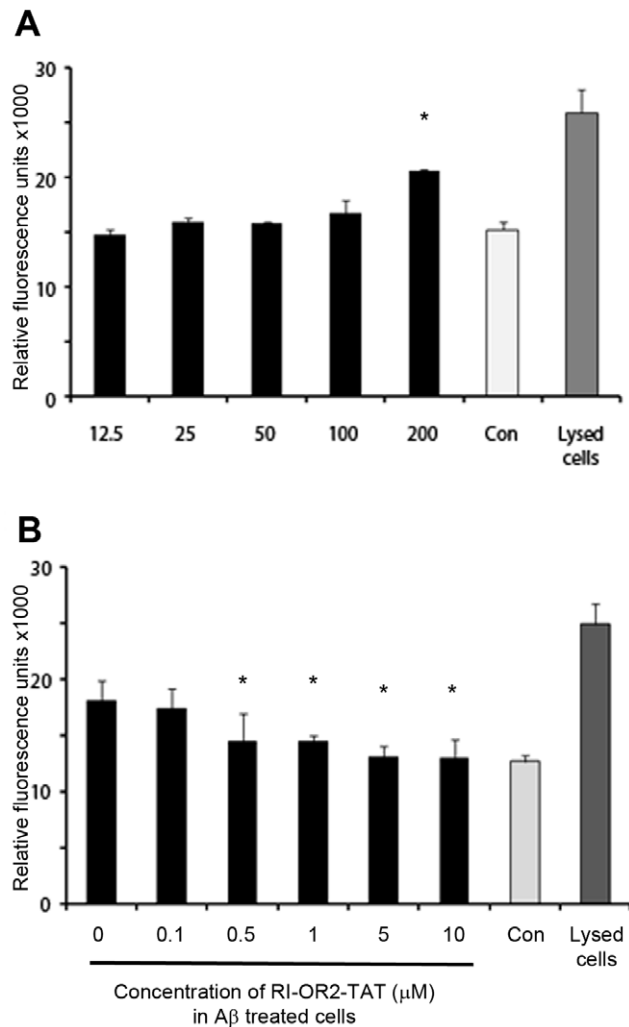

**Figure 3. RI-OR2-TAT inhibits the toxic effects of Aβ42 on cells.** (A) The black bars show data for the viability of SHSY-5Y neuroblastoma cells, as measured by LDH assay, following exposure to 12.5, 25, 50, 100 and 200 μM RI-OR2-TAT alone for 24 h. The light grey 'Con' bar shows data for cells maintained under the same conditions, but without RI-OR2-TAT, and the dark grey bar shows data for lysed cells. (B) Shows the ability of RI-OR2-TAT to protect against Aβ42-mediated toxicity. The black bars are LDH assay data for cells grown in the presence of 5 μM Aβ42 plus 0.1, 0.5, 1, 5 or 10 μM RI-OR2-TAT for 24 h. The '0' bar shows data for cells grown in the presence of Aβ42 alone and the bars labelled 'Con' and 'Lysed cells' are the same as for (A). For both (A) and (B) \*indicates  $p < 0.05$ . doi:10.1371/journal.pone.0054769.g003

For experiment 1, sections were visualized using multichannel filters and images were merged using the microscope software.

### ELISA Assay for Aβ Oligomer Analysis

Human oligomerised Aβ was measured using a kit purchased from Invitrogen, according to the manufacturer's instructions. Briefly, the right hemispheres from the brains of transgenic APP/PS1 mice treated with RI-OR2-TAT, or controls, were pooled separately and homogenized. Quantification of total protein was determined using the Bradford protein assay and was measured on a Nanophotometer (Implen, Germany). The homogenates were centrifuged at 100,000 g at 4°C for 1 h. The supernatant was then diluted 1:10 before carrying out the sandwich ELISA, which

measures soluble Aβ oligomer levels, but not amyloid monomers, as detailed in the manufacturer's protocol. The final Aβ oligomer values were determined following normalization of total protein levels.

### Statistics

The data are presented as either mean  $\pm$  standard deviation (*in vitro* aggregation and cell culture experiments) or mean  $\pm$  standard error of the mean (*in vivo* experiments). Treated versus control conditions were compared using a student t-test and a  $p$ -value of  $< 0.05$  was considered to be statistically significant.

### Results

#### RI-OR2-TAT Inhibits the Formation of Aβ42 Oligomers and Fibrils *in vitro*

In a thioflavin T (ThT) assay, which detects mainly amyloid fibrils, the presence of RI-OR2-TAT resulted in lower fluorescence after 48 h incubation of Aβ42 at molar ratios of 1:1, 1:2, 1:4 and 1:10 (inhibitor:Aβ42) and seemed to be a slightly better inhibitor than RI-OR2 (Fig. 1A). These inhibitors were also tested in an immunoassay technique for the detection of early-stage Aβ oligomers [16]. This assay uses monoclonal anti-Aβ antibody 6E10 to capture Aβ from solution and a biotinylated form of 6E10 as the detection antibody, in a sandwich system. Monomeric Aβ has only a single 6E10 epitope, which is occupied by the capture antibody, and so it cannot subsequently bind to the detection antibody. On the other hand, multimeric Aβ has binding sites available for both capture and detection, giving rise to a strong immunoassay signal. In Aβ aggregation time-course experiments, this assay produces a signal before the ThT method, when only small oligomers are present [16]. RI-OR2-TAT considerably reduced the development of an immunoassay signal, at 2:1 and 1:1 molar ratios of inhibitor:Aβ42, even at the earliest time points where such a signal was detectable (4 and 8 h), indicating inhibition of oligomer formation (Fig. 1B). This was confirmed by atomic force microscope (AFM) images (Fig. 1C), which showed clear inhibition of oligomer formation at a 1:2 molar ratio of RI-OR2-TAT:Aβ42.

#### RI-OR2-TAT has an Increased Binding Affinity for Aβ42 Compared to RI-OR2

RI-OR2-TAT was shown to bind to immobilized Aβ in a concentration-dependent manner, when surface plasmon resonance (SPR) spectroscopy was used to estimate the binding constant between this inhibitor and fibrils derived from Aβ42 (Fig. 2). The binding was characterized by a fast association rate and a slow dissociation rate, with  $k_{on}$  values of  $3680 \pm 615 \text{ M}^{-1} \text{ s}^{-1}$  and  $k_{off}$  values of  $3.7 \pm 1.5 \times 10^{-4} \text{ s}^{-1}$ , respectively. The curves were fitted separately using the simplest Langmuir 1:1 interaction model, and the calculated apparent affinity value ( $k_d$ ) was 58–125 nM. This range of values represents a  $k_d$  of RI-OR2-TAT for Aβ42 fibrils that is ~100-fold lower than that previously reported for RI-OR2 [16], indicating a correspondent increase in affinity. The fit using the 1:1 Langmuir interaction model was considered satisfactory since the residuals automatically calculated from Qdat were maintained at  $< 5\%$  of the maximum experimental response [Qdat Tutorial, ICx Nomadics]. Using a "two-compartment" model, taking into account a possible mass transport limitation as a factor that influences the binding, we did not obtain better results.

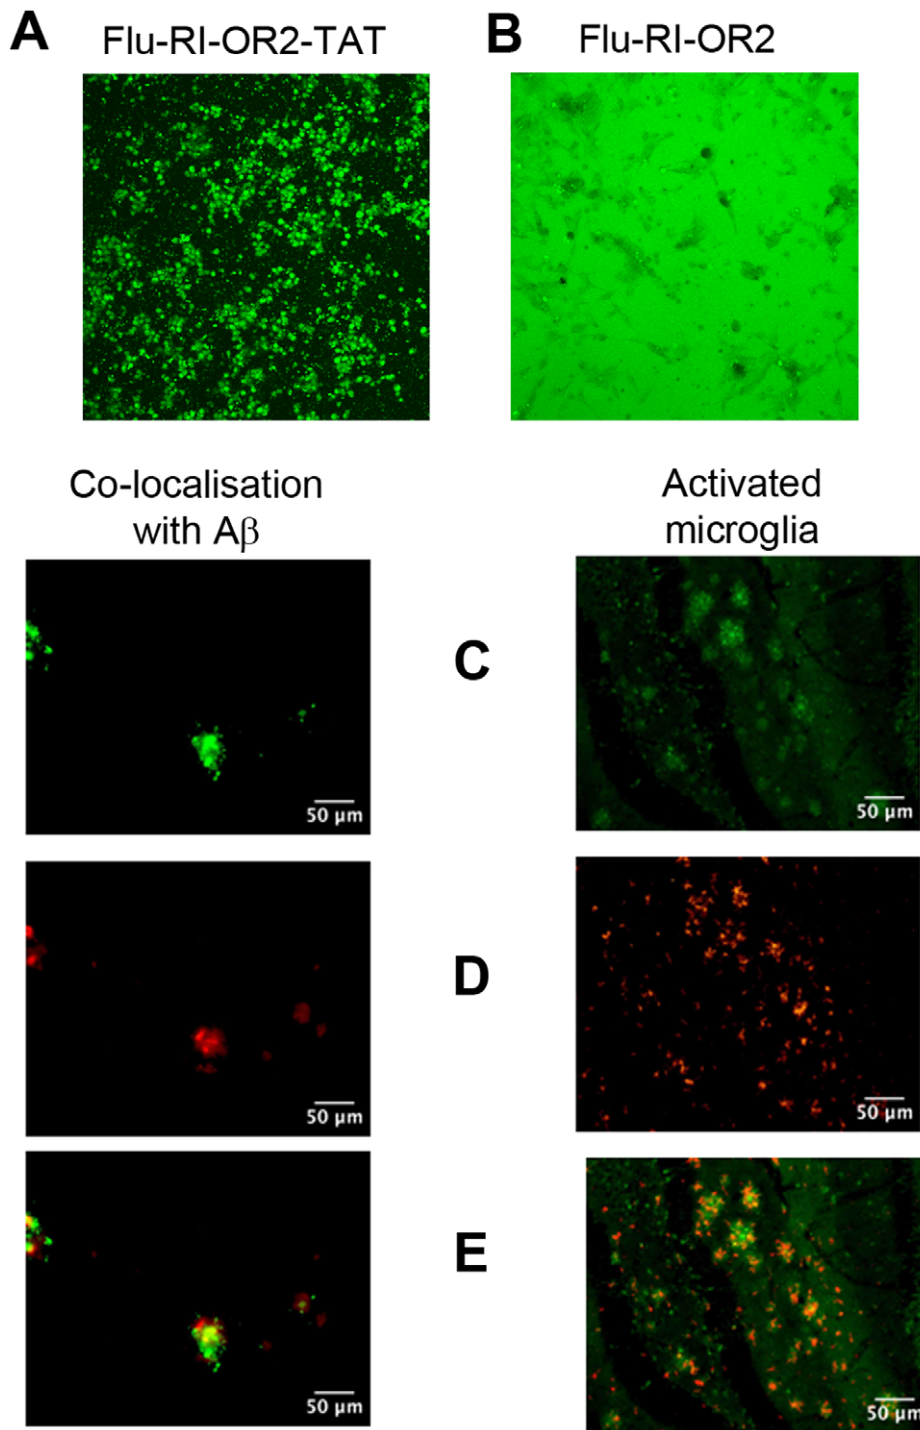

**Figure 4. Flu-RI-OR2-TAT enters cultured SHSY-5Y cells and crosses the blood brain barrier of APP/PS1 transgenic mice.** (A) Fluorescent microscope image of SHSY-5Y cells exposed to 1  $\mu$ M RI-OR2-TAT for 10 mins. (B) Corresponding image for cells exposed to Flu-RI-OR2, also at 1  $\mu$ M, but for 1 h. (C) Fluorescence images showing the detection of Flu-RI-OR2-TAT in sections of brain tissue following i.p. injection in 17-month old APP/PS1 transgenic mice. (D) Shows the same sections as in (C) but with detection using AlexaFluor 555 labelled antibody against either (on the left) A $\beta$  or (on the right) activated microglia/Iba 1. (E) Shows merged images of (C) and (D) above. Flu-RI-OR2-TAT is seen to be co-localised with A $\beta$  and with activated microglial cells. doi:10.1371/journal.pone.0054769.g004

#### RI-OR2-TAT Inhibits the Toxic Effects of A $\beta$ 42 on Cultured Cells

Exposure to RI-OR2-TAT for 24 h had no effect on the viability of SHSY-5Y cells, as measured by lactate dehydrogenase

(LDH) assay, at concentrations of up to 100  $\mu$ M, but the inhibitor was toxic at 200  $\mu$ M (Fig. 3A). RI-OR2-TAT (at 0.5, 1, 5 or 10  $\mu$ M) protected against the toxic effects of pre-aggregated A $\beta$ 42 (5  $\mu$ M) on these cells (Fig. 3B).

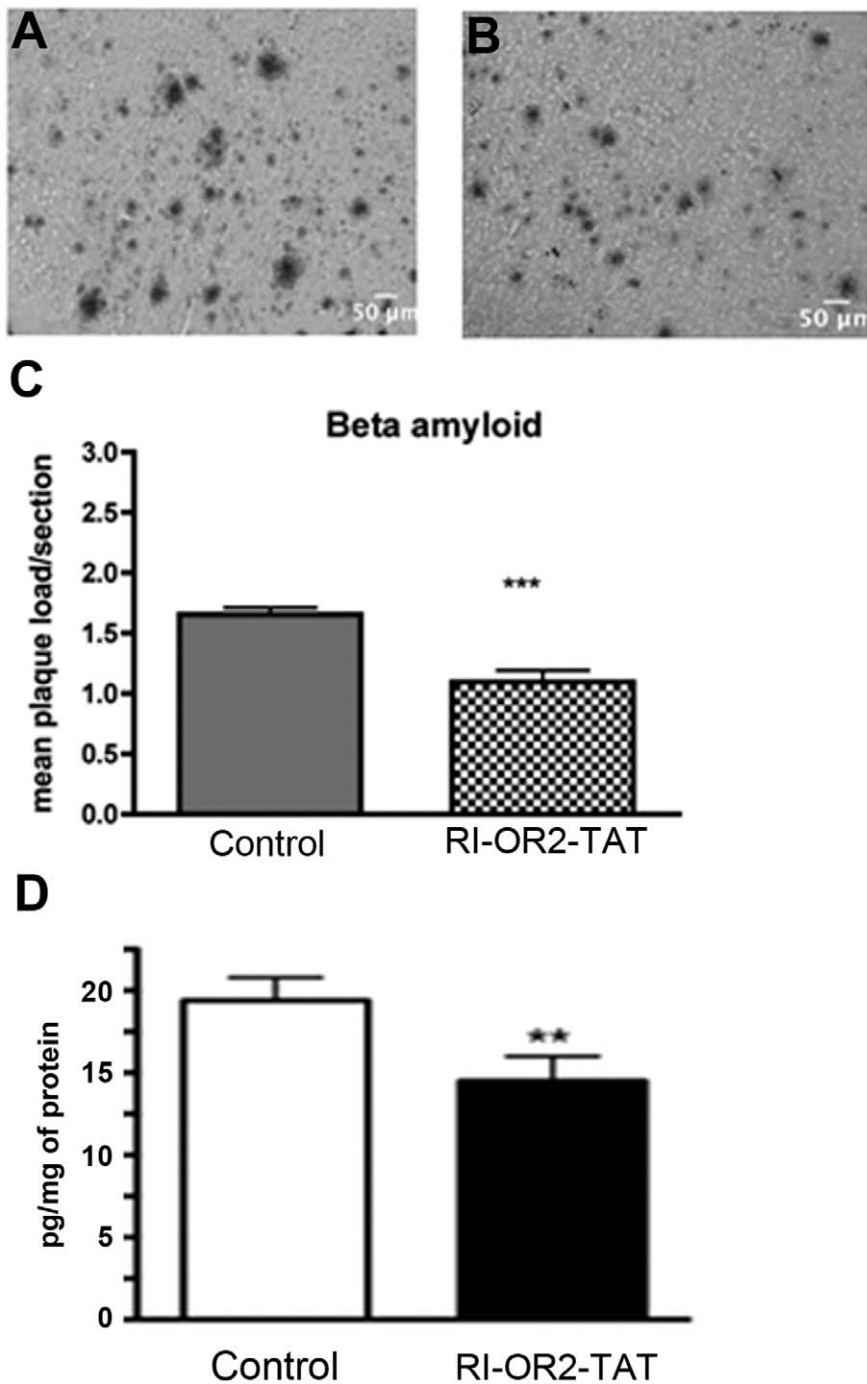

**Figure 5. RI-OR2-TAT reduces the  $\beta$ -amyloid plaque load and levels of A $\beta$  soluble oligomers in the brains of APP/PS1 transgenic mice.** Representative images show amyloid deposits in the cortex region of 10 months old APP/PS1 mouse brains as shown by  $\beta$ -amyloid immunostaining in animals treated with (A) 0.9% saline or (B) 100 nmol/kg RI-OR2-TAT in 0.9% saline. (C) Quantitative analysis shows a decrease in mean plaque load in the cortex of APP/PS1 mice treated with RI-OR2-TAT compared to animals treated with saline. (D) Levels of soluble A $\beta$  oligomers in these brains. Values represent mean  $\pm$  SEM of 4 animals per group, where \*\*\*  $p < 0.0001$ ; \*\*  $p < 0.01$ , unpaired Student t-test. doi:10.1371/journal.pone.0054769.g005

#### RI-OR2-TAT Enters Cultured Cells and Crosses the Blood Brain Barrier of APP/PS1 Transgenic Mice

Fluorescein-labelled versions of RI-OR2 (Flu-RI-OR2, fluorescein-rGffvlkGr-NH<sub>2</sub>) and RI-OR2-TAT (Flu-RI-OR2-TAT, fluorescein-rGffvlkGrrrrqrkkkrGy-NH<sub>2</sub>) were used for these experiments. Fluorescent and light microscope images of SHSY-5Y cells exposed to 1  $\mu$ M Flu-RI-OR2-TAT for 10 mins showed the build

up of fluorescence inside the cells (Fig. 4A), whereas the fluorescence associated with Flu-RI-OR2 remained in the culture medium (Fig. 4B). Flu-RI-OR2-TAT was detected in sections of brain tissue following intraperitoneal (i.p.) injection in 17-month old APP/PS1 transgenic mice, demonstrating that it can cross the BBB. In a double labelling study, using AlexaFluor 555 labelled antibody against A $\beta$ , Flu-RI-OR2-TAT was found to be co-



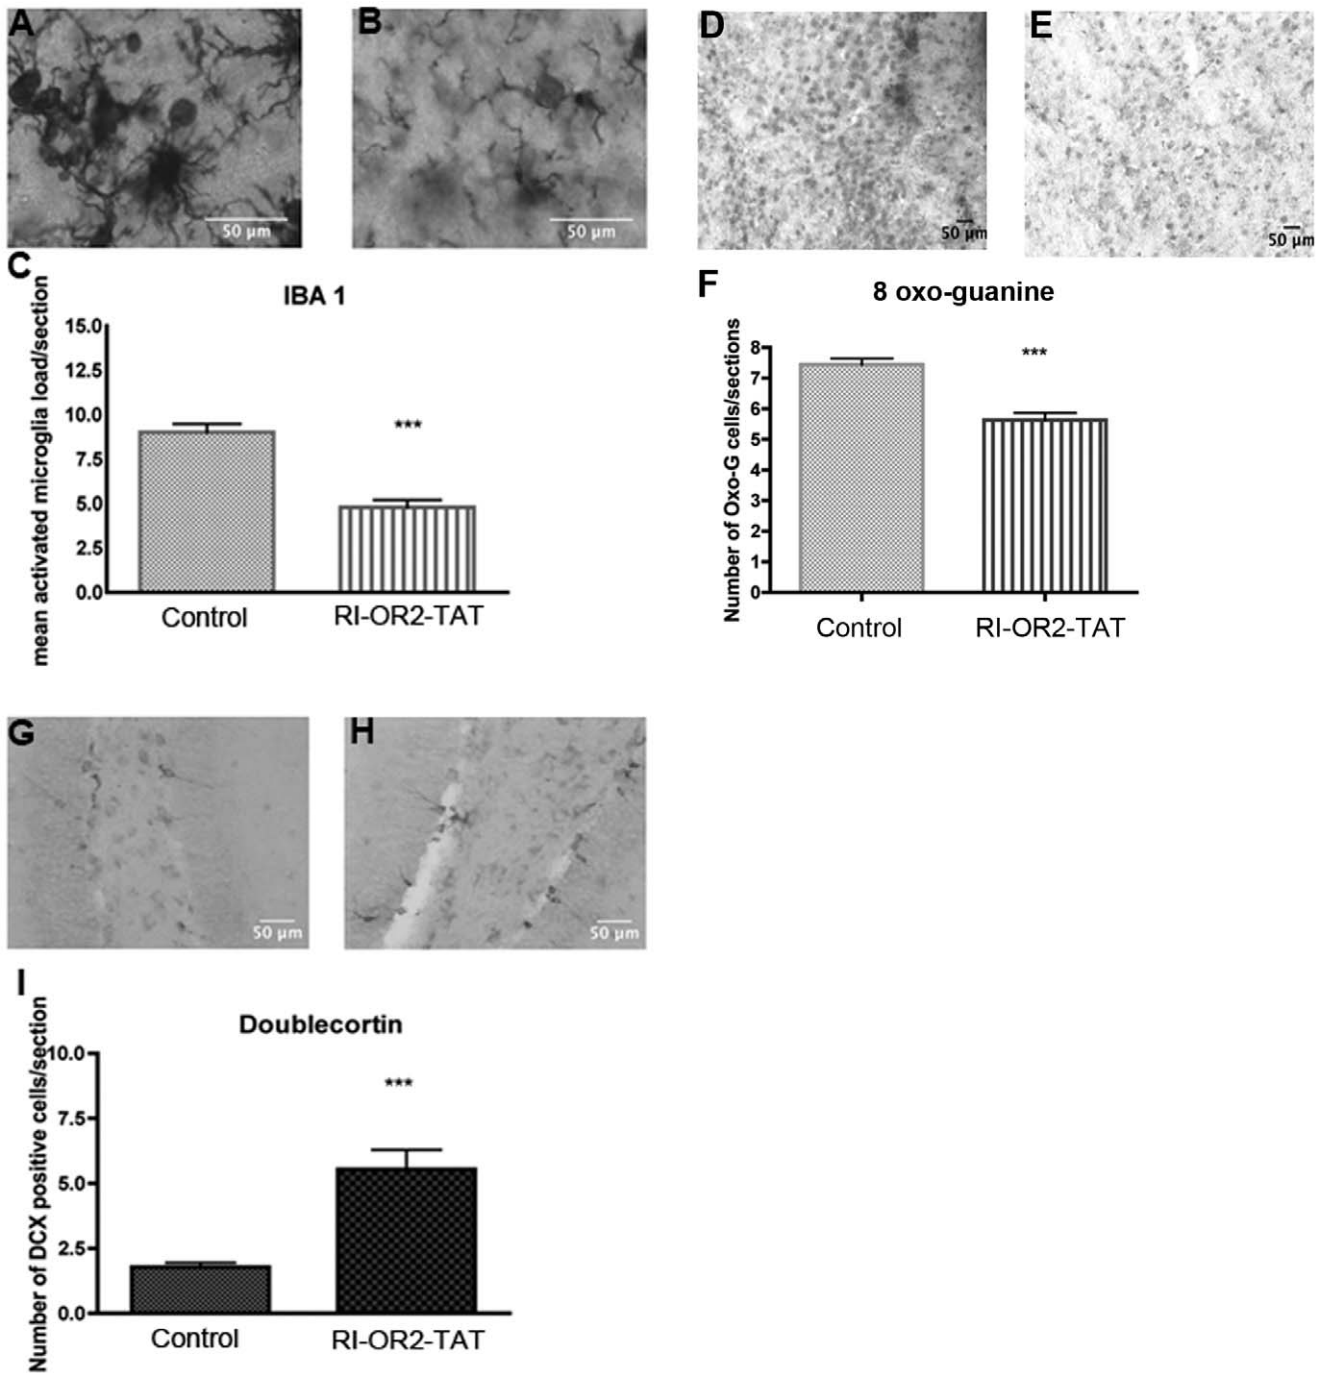

**Figure 6. RI-OR2-TAT reduces the brain load of microglia and oxidative damage and stimulates neurogenesis in APP/PS1 transgenic mice.** Representative images of activated microglia in the cortical region of APP/PS1 mouse brains as shown by Iba1 immunostaining in animals treated with (A) 0.9% saline or (B) 100 nmol/kg RI-OR2-TAT in 0.9% saline; (C) quantitative analysis shows a decrease in mean microglial load in APP/PS1 mice treated with RI-OR2-TAT; detection of 8 oxo-guanine in the brains of animals treated with (D) 0.9% saline or (E) 100 nmol/kg RI-OR2-TAT; (F) quantitative analysis shows a decrease in mean 8 oxo-guanine staining in APP/PS1 mice treated with RI-OR2-TAT; detection of immature neurons as stained for doublecortin in the dentate gyrus of APP/PS1 mice treated with (G) 0.9% saline or (H) 100 nmol/kg RI-OR2-TAT; (I) quantitative analysis shows an increase in mean doublecortin staining in APP/PS1 mice treated with RI-OR2-TAT. Values represent mean  $\pm$  SEM of 4 animals per group, where \*\*\*  $p < 0.0001$ , unpaired Student t-test. doi:10.1371/journal.pone.0054769.g006

localised with amyloid plaques present in the cerebral cortex. In a parallel study AlexaFluor 555 labelled antibody targeting activated microglia/Iba 1 and Flu-RI-OR2-TAT were also found inside activated microglial cells (Fig. 4C, D, E).

#### RI-OR2-TAT Decreases Brain A $\beta$ Oligomer Levels and Amyloid Plaque Load in APP/PS1 Transgenic Mice

As shown in Fig. 5 (A, B, C), treatment with 100 nmol/kg RI-OR2-TAT over a period of 21 days reduced amyloid plaque load



by 32% in the cortex region of 10 months old APP/PS1 mouse brains, compared to animals treated with saline, as detected by  $\beta$ -amyloid immunostaining ( $p < 0.0001$ , unpaired Student t-test,  $N = 4$  animals per group). Soluble A $\beta$  oligomer levels in the brain, as detected by sandwich ELISA, were also reduced, by 25% ( $p < 0.01$ , unpaired Student t-test) (see **Fig. 5D**).

### RI-OR2-TAT Decreases Microglial Activation and Oxidative Stress, and Stimulates Neurogenesis in the Brains of APP/PS1 Transgenic Mice

We assayed three markers to show the effect of RI-OR2-TAT on mouse brain: Iba1 is specifically expressed in microglia and is upregulated when the cells are activated [31]; 8-oxo-guanine is one of the most common DNA damage products seen in the presence of ROS; Doublecortin is a microtubule-associated protein, expressed in immature neurons, that is required for migration into the cerebral cortex [32].

Treatment with RI-OR2-TAT reduced the number of activated microglia observed in random sections of the cortex of APP/PS1 mouse brains of 10 months of age by 44% as shown by Iba1 immunostaining ( $p < 0.0001$ , unpaired Student t-test) (**Fig. 6A, B, C**). This treatment also reduced the cortical level of 8-oxo-guanine immunostaining by 25% ( $p < 0.0001$ , unpaired Student t-test) (see **Fig. 6D, E, F**), and there was an increase in the mean number of young doublecortin-expressing neurons in the dentate region by 210% ( $p < 0.0001$ , unpaired Student t-test), all in comparison to control/saline treated animals (see **Fig. 6G, H, I**).

## Discussion

RI-OR2, without the TAT amino acid sequence, has been shown previously to inhibit A $\beta$  oligomer and fibril formation *in vitro*, as demonstrated by the use of several different experimental techniques, and to block the toxic effects of A $\beta$  on cultured cells [16]. Also, being a retro-inverso peptide, RI-OR2 is highly resistant to proteolysis and so should be stable *in vivo* [16]. Here, we have attached a retro-inverted version of the HIV-1 'TAT' sequence to RI-OR2, in an attempt to target this inhibitor into the brain. The TAT sequence was incorporated in this way so that the protease resistance of the whole molecule would be maintained, which should result in good *in vivo* bioavailability. The data presented in **Fig. 1** and **Fig. 3** are consistent with our previous publication [16] and show that RI-OR2-TAT has similar properties to RI-OR2 as an A $\beta$  aggregation inhibitor *in vitro*.

The retro-inverted TAT sequence was effective as a transit peptide, as demonstrated by the rapid entry of Flu-RI-OR2-TAT into cultured cells (this happened within minutes under our experimental conditions), whereas Flu-RI-OR2 stayed mainly in the culture medium (**Fig 4 A, B**). Flu-RI-OR2-TAT was also able to penetrate across the BBB following its peripheral (i.p.) administration into APP/PS1 transgenic mice. This is not surprising because the TAT sequence has been employed previously to enable a variety of molecules to cross the BBB [33], [34] and this activity is known to be retained in retro-inverso TAT [35], [36]. Following penetration into the brain, Flu-RI-OR2-TAT was found to be attached to amyloid plaques and to activated microglial cells (**Fig. 4C, D, E**). This interaction with amyloid plaques would be anticipated given the relatively high binding affinity ( $k_d = 58\text{--}125$  nM) between RI-OR2-TAT and A $\beta$ 42 amyloid fibrils, as calculated from our SPR data (**Fig. 2**). The marked increase in the binding affinity of RI-OR2-TAT compared to that previously reported for RI-OR2 [16] could be due to the presence of several positively charged amino-acid residues on the TAT portion of the retro-inverso peptide. In fact,

Zhang *et al* [37], when studying the interaction of a series of synthetic peptides with A $\beta$ , suggested that an increase in positive charge might increase their avidity for binding to amyloid fibrils. The finding that Flu-RI-OR2-TAT accumulates inside activated microglial cells is also expected, because they actively take up amyloid by phagocytosis and are involved in the clearance of A $\beta$  [38]. Thus, Flu-RI-OR2-TAT within microglia is presumably attached to A $\beta$  fibrils, although ultrastructural studies (e.g. immunogold labelling) would be required to confirm this.

In order to determine effects on brain pathology, RI-OR2-TAT was injected peripherally (i.p.) into APP/PS1 mice every day for 21 days, at 100 nmol/kg. This dose was chosen because it is similar to that used in a previous study with another peptide drug, which was also injected i.p. and reduced amyloid plaque count and inflammation in the brain [39]. When the brains were removed and examined, we found a marked and highly significant reduction in: (i) amyloid plaque load; (ii) the numbers of activated microglial cells; and (iii) the amount of oxidative damage (i.e. 8-oxo-guanine staining). RI-OR2-TAT also reduced the level of A $\beta$  oligomers in the cerebral cortex of the APP/PS1 mice. Further studies would be required to determine if any particular type of oligomer (e.g. dimer, trimer or higher molecular weight oligomer) is differentially affected, but our *in vitro* studies suggest that the inhibitor intervenes at a very early point in the aggregation pathway. These effects of RI-OR2-TAT on the level of A $\beta$  oligomers (and on the other measures of brain pathology) might be improved by the use of an alternative dosing regimen, and/or by optimisation of the peptide sequence. We are also pursuing an alternative approach to increase the potency of RI-OR2-TAT against A $\beta$  aggregation by attaching it onto the surface of nanoparticles, to produce a multivalent inhibitor. Multivalency has already been shown to improve the activity of another peptide aggregation inhibitor [40], and we have recently employed a similar strategy for curcumin, an alternative inhibitor of A $\beta$  oligomer formation [41].

The inhibition of amyloid plaque load seen in the APP/PS1 transgenic mice injected with RI-OR2-TAT would be expected to result in fewer activated microglial cells, because the latter are known to congregate around the amyloid cores of senile plaques. The reduction of oxidative stress in the transgenic mice treated with RI-OR2-TAT could also be explained by its ability to reduce microglial cell numbers, because these cells are responsible for the formation and release of free radicals and cytokines involved in chronic inflammation and oxidation reactions [42]. However, the inhibition of oxidative damage seen in the treated mice could also be linked directly with the effects of RI-OR2-TAT on A $\beta$  aggregation. Reactive oxygen species (ROS) have been shown to be generated during the early stages of A $\beta$  aggregation, *via* an interaction between A $\beta$  and redox-active metal ions, and an early-stage aggregation inhibitor would be expected to block this source of ROS formation [43]. A $\beta$  oligomers have also been reported to induce calcium ion influx into cells and, subsequently, oxidative damage, through their ability to form ion-permeable 'pores' in cell membranes [44]. The reduction of microglial cell load and 8-oxo-guanine levels seen following treatment with RI-OR2-TAT are, therefore, both likely to be a 'downstream' consequence of the ability of this inhibitor to reduce A $\beta$  oligomer and/or amyloid fibril formation. Our data, therefore, support the notion that A $\beta$  aggregation is an earlier event than oxidative stress in the pathogenesis of AD, rather than the other way around [45].

The dramatic effect of treatment with RI-OR2-TAT on the number of immature neurons in the dentate gyrus of the APP/PS1 transgenic mouse brains was less anticipated, and suggests that the drug promotes a recovery of neurogenesis, although this

will have to be confirmed by probing the rate of nerve cell proliferation using markers such as BrdU or phosphorylated histone-3. Inhibition of nerve stem cell proliferation could be a downstream consequence of A $\beta$  aggregation. It is well known that pro-inflammatory cytokines reduce stem cell proliferation, and that this mechanism has serious consequences for brain function [46], [47]. Thus, one possibility is that RI-OR2-TAT could rescue brain stem cells from the damaging pro-inflammatory effects of A $\beta$ . Another possibility is that A $\beta$  oligomers have a direct toxic effect on brain stem cells and that RI-OR2-TAT protects against this effect.

There have been some high profile failures of various drug candidates targeted at the formation or aggregation of A $\beta$  in recent years [48]. Most notably, the development of inhibitors of  $\beta$ -secretase ( $\beta$ -amyloid cleaving enzyme-1 or BACE-1) has proved to be difficult because of inherent medicinal chemistry problems [49] and inhibitors of  $\gamma$ -secretase have resulted in undesirable side-effects, due to inhibition of Notch processing [50]. 'Notch sparing'  $\gamma$ -secretase inhibitors are in development, but could fail because of side effects due to the unavoidable accumulation of the toxic carboxyl-terminal fragment of APP (CTF $\beta$ ) [50]. Direct immunisation with A $\beta$ , or passive immunization with anti-A $\beta$  antibodies, is one of the most advanced approaches, but the first clinical trial of immunisation with pre-aggregated A $\beta$ 42 (AN1792) was stopped because of adverse effects involving detrimental T-cell-mediated brain inflammation [51]. Follow-up strategies to this are underway, but none have succeeded so far in any late-stage clinical trial [51]. This includes Bapineuzumab (Johnson and Johnson), which showed no significant effect on AD patients (results late 2012), and Solanezumab (Eli Lilly), which did not achieve key Phase III trial goals of improved cognition and function in mild-to-

moderate AD sufferers (presented at CTAD 2012). Another promising discovery has been the finding that curcumin, derived from the dietary spice turmeric, is an effective inhibitor of A $\beta$  aggregation [5], [52]. However, curcumin itself exhibits poor bioavailability and so is unsuitable as a drug candidate. Various derivatives of curcumin, with improved bioavailability, are being developed, but have not yet reached clinical trials [41], [53]. Because of these various problems and set-backs, there is still an urgent need for the development of alternative drugs for testing against AD. Recently, oral administration of the anti-cancer drug bexarotene has been shown to enhance clearance of soluble A $\beta$ , through apoE-mediated mechanisms, and to reduce  $\beta$ -amyloid plaque deposits in mice, but is yet to be tested against human AD [54]. Apart from curcumin [52], the only other inhibitors of A $\beta$  oligomer formation reported to have been tested in animal models of AD are 1,4-naphthoquinon-2-yl-L-tryptophan (NQTrp), which reversed phenotypic changes in *Drosophila* [55], and an amyloid- $\beta$ 42 oligomer-specific monoclonal antibody (A8), which improved memory performance in SAMP8 mice [56]. The data presented here for RI-OR2-TAT are encouraging and identify oxidative damage, inflammation, and inhibition of neurogenesis, as downstream consequences of A $\beta$  aggregation. We hope to develop this inhibitor to the stage where it can enter human clinical trials.

## Author Contributions

Conceived and designed the experiments: DA CH MT OK MM. Performed the experiments: VP PLM MT CT GJ ES MG. Analyzed the data: CH MT OK MM. Contributed reagents/materials/analysis tools: ES MG MM CT OK. Wrote the paper: DA.

## References

- Brookmeyer R, Gray S, Kawas C (1998) Projections of Alzheimer's disease in the United States and the public health impact of delaying disease onset. *Am J Public Health* 88: 1337–1342.
- American Health Assistance Foundation website. Available: <http://www.ahaf.org/alzheimers/about>. Accessed 2012 Nov 1.
- Hardy J, Allsop D (1991) Amyloid deposition as the central event in the aetiology of Alzheimer's disease. *Trends Pharmacol Sci* 12, 383–388.
- Karran E, Mercken M, De Strooper B (2011) The amyloid cascade hypothesis for Alzheimer's disease: an appraisal for the development of therapeutics. *Nat Rev Drug Discov* 10: 698–712.
- Ma QL, Yang F, Rosario ER, Ubuda OJ, Beech W, et al. (2009)  $\beta$ -amyloid oligomers induce phosphorylation of tau and inactivation of insulin receptor substrate via c-Jun N-terminal kinase signaling: suppression by omega-3 fatty acids and curcumin. *J Neurosci* 29: 9078–9089.
- Lambert MP, Barlow AK, Chromy BA, Edwards C, Freed R, et al. (1998) Diffusible, nonfibrillar ligands derived from A $\beta$  1–42 are potent central nervous system neurotoxins. *Proc Natl Acad Sci USA* 95: 6448–6453.
- Wang HW, Pasternak JF, Kuo H, Ristic H, Lambert MP, et al. (2002) Soluble oligomers of  $\beta$  amyloid (1–42) inhibit long-term potentiation but not long-term depression in rat dentate gyrus. *Brain Res* 924: 133–140.
- Walsh DM, Klybin I, Fadeeva JV, Cullen WK, Anwyl R, et al. (2002) Naturally secreted oligomers of amyloid  $\beta$  protein potently inhibit hippocampal long-term potentiation in vivo. *Nature* 416: 535–539.
- Kim HJ, Chae SC, Lee DK, Chromy B, Lee SC, et al. (2003) Selective neuronal degeneration induced by soluble oligomeric amyloid  $\beta$  protein. *FASEB J* 17: 118–120.
- Cleary JP, Walsh DM, Hofmeister JJ, Shankar GM, Kuskowski MA, et al. (2005) Natural oligomers of the amyloid- $\beta$  protein specifically disrupt cognitive function. *Nature Neurosci* 8: 79–84.
- Walsh DM, Selkoe DJ (2007) A $\beta$  oligomers - a decade of discovery. *J Neurochem* 101: 1172–1184.
- Haass C, Selkoe DJ (2007) Soluble protein oligomers in neurodegeneration: lessons from the Alzheimer's amyloid  $\beta$ -peptide. *Nature Rev Mol Cell Biol* 8: 101–112.
- Citron M (2010) Alzheimer's disease: strategies for disease modification. *Nat Rev Drug Discov* 9: 387–398.
- De Felice FG, Vicira MN, Saraiva LM, Figueroa-Villar JD, Farcia-Abreu J, et al. (2004) Targeting the neurotoxic species in Alzheimer's disease: inhibitors of A $\beta$  oligomerization. *FASEB J* 18: 1366–1372.
- Howlett D (2011) APP transgenic mice and their application to drug discovery. *Histol Histopathol* 26: 1611–1632.
- Taylor M, Moore S, Mayes J, Parkin E, Beeg M, et al. (2010) Development of a proteolytically stable retro-inverso peptide inhibitor of  $\beta$ -amyloid oligomerization as a potential novel treatment for Alzheimer's disease. *Biochemistry* 20: 3261–3272.
- Tjernberg LO, Näslund J, Lindqvist F, Johansson J, Karlström AR, et al. (1996) Arrest of  $\beta$ -amyloid fibril formation by a pentapeptide ligand. *J Biol Chem* 271: 8545–8548.
- Tjernberg LO, Callaway DJO, Tjernberg A, Hahne S, Lillichöök C et al. (1999) A molecular model of Alzheimer amyloid  $\beta$ -peptide fibril formation. *J Biol Chem* 274: 12619–12625.
- Sciarretta KL, Gordon DJ, Meredith SC (2006) Peptide-based inhibitors of amyloid assembly. *Methods Enzymol* 413: 273–312.
- Soto C, Kindy MS, Baumann M, Frangione B (1996) Inhibition of Alzheimer's amyloidosis by peptides that prevent  $\beta$ -sheet conformation. *Biochem Biophys Res Commun* 226: 672–680.
- Soto C, Sigurdsson EM, Morelli L, Kumar RA, Castano EM, et al. (1998)  $\beta$ -sheet breaker peptides inhibit fibrillogenesis in a rat brain model of amyloidosis: implications for Alzheimer's therapy. *Nature Med* 4: 822–826.
- Gordon DJ, Sciarretta KL, Meredith SC (2001) Inhibition of  $\beta$ -amyloid (40) fibrillogenesis and disassembly of  $\beta$ -amyloid (40) fibrils by short  $\beta$ -amyloid congeners containing N-methyl amino acids at alternate residues. *Biochemistry* 40: 8237–8245.
- Kokkoni N, Stott K, Amjee H, Mason JM, Doig AJ (2006) N-Methylated peptide inhibitors of  $\beta$ -amyloid aggregation and toxicity. Optimization of the inhibitor structure. *Biochemistry* 45: 9906–9918.
- Ghanta J, Shen CL, Kiessling LL, Murphy RM (1996) A strategy for designing inhibitors of  $\beta$ -amyloid toxicity. *J Biol Chem* 271: 29525–29528.
- Poduslo JF, Curran GL, Kumar A, Frangione B, Soto C (1999)  $\beta$ -sheet breaker peptide inhibitor of Alzheimer's amyloidogenesis with increased blood-brain barrier permeability and resistance to proteolytic degradation in plasma. *J Neurobiol* 39: 371–382.
- Findeis MA, Musso GM, Arico-Muendel CC, Benjamin HW, Hundal AM, et al. (1999) Modified-peptide inhibitors of amyloid  $\beta$ -peptide polymerization. *Biochemistry* 38: 6791–6800.
- Green M, Loewenstein PM (1988) Autonomous functional domains of chemically synthesized human immunodeficiency virus tat trans-activator protein. *Cell* 55: 1179–1188.

28. Aguilar MI, Small DH (2005) Surface plasmon resonance for the analysis of  $\beta$ -amyloid interactions and fibril formation in Alzheimer's disease research. *Neurotox Res* 7: 17–27.
29. Horcas I, Fernandez R, Gomez-Rodriguez JM, Colchero J, Gomez-Herrero J, et al. (2007) WSXM: a software for scanning probe microscopy and a tool for nanotechnology. *Rev Sci Instrum* 78: 013705.
30. Imai Y, Kohsaka S (2002) Intracellular signaling in M-CSF-induced microglia activation: role of Iba1. *Glia* 40, 164–174.
31. Imai Y, Ibata I, Ito D, Ohsawa K, Kohsaka S (1996) A novel gene *Iba1* in the major histocompatibility complex class III region encoding an EF hand protein expressed in a monocytic lineage. *Biochem Biophys Res Commun* 224: 855–862.
32. Gleeson JG, Lin PT, Flanagan LA, Walsh CA (1999) Doublecortin is a microtubule associated protein and is expressed widely by migrating neurons. *Neuron* 23: 257–71.
33. Ramanathan S, Pooyan S, Stein S, Prasad PD, Wang J, et al. (2009) Targeting the sodium-dependent multivitamin transporter (SMVT) for improving the oral absorption properties of a retro-inverso Tat nonapeptide. *Mol Phar* 6: 836–848.
34. Dietz GP, Bähr M (2004) Delivery of bioactive molecules into the cell: the Trojan horse approach. *Mol Cell Neurosci* 27: 85–131.
35. Zhang X, Jin Y, Plummer MR, Pooyan S, Gunaseclan S, et al. (2007) Endocytosis and membrane potential are required for HeLa cell uptake of R.I.-CKTat9, a retro-inverso Tat cell penetrating peptide. *Neuroscience* 150: 40–49.
36. Repici M, Centeno C, Tomasi S, Forloni G, Bonny C, et al. (2001) Time-course of c-Jun N-terminal kinase activation after cerebral ischemia and effect of D-JNKI1 on c-Jun and caspase-3 activation. *Pharm Res* 18: 950–956.
37. Zhang G, Leibowitz MJ, Sinko PJ, Stein S (2003) Multiple-peptide conjugates for binding  $\beta$ -amyloid plaques of Alzheimer's disease. *Bioconj Chem* 14: 86–92.
38. Paresce D, Chung H, Maxfield F (1997) Slow degradation of aggregates of the Alzheimer's disease amyloid  $\beta$ -protein by microglial cells. *J Biol Chem* 272: 29390–29397.
39. McClean P, Parthasarathy V, Faivre E, Hölscher C (2011) The diabetes drug liraglutide prevents degenerative processes in a mouse model of Alzheimer's disease. *J Neurosci* 31: 6587–6594.
40. Chafekar SM, Malda H, Merckx M, Meijer EW, Viertl D, et al. (2007) Branched KLVFF tetramers strongly potentiate inhibition of  $\beta$ -amyloid aggregation. *ChemBioChem* 8: 1857–1864.
41. Taylor M, Moore S, Mourtas S, Niarakis A, Re F, et al. (2011) Effect of curcumin-associated and lipid ligand-functionalized nanoliposomes on aggregation of the Alzheimer's A $\beta$  peptide. *Nanomedicine* 7: 541–550.
42. Hölscher C. (1998) Possible causes of Alzheimer's disease: amyloid fragments, free radicals, and calcium homeostasis. *Neurobiol Dis* 5: 129–141.
43. Tabner BJ, El-Agnaf OM, Turnbull S, German MJ, Paleologou KE, et al. (2005) Hydrogen peroxide is generated during the very early stages of aggregation of the amyloid peptides implicated in Alzheimer's disease and familial British dementia. *J Biol Chem* 280: 35789–35792.
44. Kagan BL, Thundimadathil J (2010) Amyloid peptide pores and the  $\beta$  sheet conformation. *Adv Exp Med Biol* 677: 150–167.
45. Nunomura A, Tamaoki T, Motohashi N, Nakamura M, McKeel DW, et al. (2012) The earliest stage of cognitive impairment in transition from normal aging to Alzheimer disease is marked by prominent RNA oxidation in vulnerable neurons. *J Neuropathol Exp Neurol* 71: 233–241.
46. Cunningham C, Skelly DT (2011) Non-steroidal anti-inflammatory drugs and cognitive function: are prostaglandins at the heart of cognitive impairment in dementia and delirium? *J Neuroimmune Pharmacol* 7: 60–73.
47. Monje ML, Toda H, Palmer TD (2003) Inflammatory blockade restores adult hippocampal neurogenesis. *Science* 302: 1760–1765.
48. Mangialasche F, Solomon A, Winblad B, Mecocci P, Kivipelto M (2010) Alzheimer's disease: clinical trials and drug development. *Lancet Neurol* 9: 702–716.
49. Klaver DW, Wilce MC, Cui H, Hung AC, Gasperini R, et al. (2010) Is BACE1 a suitable therapeutic target for the treatment of Alzheimer's disease? Current strategies and future directions. *Biol Chem* 391: 849–859.
50. Wolfe MS (2008) Inhibition and modulation of  $\gamma$ -secretase for Alzheimer's disease. *Neurotherapeutics* 5: 391–398.
51. Schenk D. (2002) Amyloid- $\beta$  immunotherapy for Alzheimer's disease: the end of the beginning. *Nat Rev Neurosci* 3: 824–828.
52. Yang F, Lim GP, Begum AN, Ubeda OJ, Simmons MR, et al. (2005) Curcumin inhibits formation of amyloid  $\beta$  oligomers and fibrils, binds plaques, and reduces amyloid in vivo. *J Biol Chem* 280: 5892–5901.
53. Chen SY, Chen Y, Li YP, Chen SH, Tan JH, et al. (2011) Design, synthesis, and biological evaluation of curcumin analogues as multifunctional agents for the treatment of Alzheimer's disease. *Bioorg Med Chem* 19: 5596–5604.
54. Cramer PE, Cirrito JR, Wesson DW, Lee CY, Karlo JC, et al. (2012) ApoE-directed therapeutics rapidly clear  $\beta$ -amyloid and reverse deficits in AD mouse models. *Science* 335: 1503–1506.
55. Scherzer-Attali R, Pellarin R, Convertino M, Frydman-Marom A, Egoz-Matia N, et al. (2010) Complete phenotypic recovery of an Alzheimer's disease model by a quinone-tryptophan hybrid aggregation inhibitor. *PLoS One* 5: e11101.
56. Zhang Y, He JS, Wang X, Wang J, Bao FX, et al. (2011) Administration of amyloid- $\beta$ 42 oligomer-specific monoclonal antibody improved memory performance in SAMP8 mice. *J Alzheimers Dis* 23: 551–561.
